# Supplementary material for: Ataxin-10 is part of a cachexokine cocktail triggering cardiac metabolic dysfunction in cancer cachexia
Source: PubMed Central journal article supplement — Mol Metab. 2015 Nov 26;5(2):67–78. doi: 10.1016/j.molmet.2015.11.004 (PMC4735665; doi:10.1016/j.molmet.2015.11.004), 2015-11-26
Supplement: mmc1.pdf [file mmc1.pdf]

## **ONLINE DATA SUPPLEMENTS**

### **Expanded Methods and Results**

#### **Animal handling**

In each animal experiment, mice were randomly assigned to each group. Number of animals per group to detect biologically significant effect sizes was calculated using appropriate statistical sample size formula and indicated in the biometrical planning section of the animal license submitted to the governing authority.

All mice were maintained on a 12 hrs light-dark cycle at 22°C with ad libitum access to regular unrestricted diet (Kliba Nafag #3437, Promivi Kliba AG, Kaiseraugst, CH) and water. Mice were killed by cervical dislocation and blood was taken for serum preparation. Organs including tumor, liver, heart, fat pads and GC were weighed, prepared for histology, snap frozen and used for further analysis. Left hind leg was removed for assessment of tibia length.

#### **Echocardiography**

C26 mice: Two-dimensional transthoracic echocardiography was performed on conscious mice by using Vevo 2100 (VisualSonics, Ontario, CA) by a single investigator. For assessment of systolic function B-mode parasternal long axis (PSLAX) was performed. Fractional shortening was calculated semi-automatically by supplied tracing software.

MC38 and APC delta 580 mice: A two-dimensional parasternal short axis view and M-Mode tracings of the left ventricle of conscious mice were obtained using a Sonos 5500 echocardiogram with a linear S 15 transducer (15 Hz) (Philips Healthcare, Eindhoven, NL). M-Mode tracings were used to determine left ventricular internal diameter as the largest anteroposterior diameter in either diastole (left ventricular end diastolic diameter (LVEDD)) or systole (left ventricular end systolic diameter (LVESD)). Diameters were averaged from at least three consecutive cardiac cycles. Left ventricular fractional shortening (FS) was calculated as  $(LVEDD-LVESD)/LVEDD$  and expressed as a percentage.

## **Pressure-Volume loop measurement**

Mice were anesthetized by intraperitoneal injection of a mixture of medetomidin (0.5 µg/g body weight), fentanyl (0.5 µg/g body weight) and midazolam (5 µg/g body weight). Body temperature was maintained at 37°C using a homoeothermic blanket. Measurements were performed in closed-chest. A 1.2 FR catheter (Scisense Inc., Ontario, CA) was placed into the left ventricle through the carotid artery of the spontaneously breathing mice. Left ventricular volumes were extrapolated from admittance magnitude and admittance phase in real time using the ADVantage PV System (Scisense Inc., Ontario, CA). Pressure and volume data were recorded using a Scisense 404 - 16 Bit Four Channel Recorder with LabScribe2 Software (Scisense Inc., Ontario, CA). Mice were sacrificed after the measurement

## **Histology**

Tissues were collected and immediately stored in 4% paraformaldehyde for 24 h. Paraffin embedded hearts were cut in 1 µm sections and mounted. Sections were stained with hematoxylin and eosin (H&E) or with Masson's trichrome by standard procedures.

Cardiomyocyte area was determined using colored pictures from H&E stained heart cross sections which were captured with a CCD camera (CC-12 camera, Olympus Soft Imaging Solutions, Münster, Germany) under 20x magnification (Olympus BX51, Hamburg, Germany) and the analySIS software (Soft Imaging Systems, Münster, Germany). Analysis was performed in a blinded manner. Only cardiomyocytes with a visible nucleus in the middle of the cell and an unbroken cellular membrane were measured.

## **High throughput analysis of cardiomyocyte size**

Neonatal rat cardiomyocytes were plated onto gelatin (0.1%) coated 384-well plates at  $6 \times 10^3$  cells/well. Three days after seeding cells were treated with conditioned SN for 24 h. Cells were incubated with primary antibody (anti-sarcomeric  $\alpha$ -actinin, 1:500 in 5% goat serum; Sigma Aldrich, #A7811) overnight. Next day, cells incubated with secondary antibody (Alexa Fluor®

488 anti-mouse, 1:400 in 5% goat serum; Life Technologies, Darmstadt, Germany) and in parallel with phalloidin-tetramethylrhodamine B isothiocyanate (phalloidin-TRITC, 1:1000 in 5% goat serum; Sigma Aldrich, #P1951) for 1 h and additionally with Hoechst (1:10,000) for 10 min. Imaging was done using an automated BD Pathway 855 Cellular Bioimaging System with a 20x objective (BD, Heidelberg, Germany) in combination with a Hamamatsu ORCA-ER Digital Camera (Hamamatsu Photonics, Herrsching am Ammersee, Germany). 25 fields per well were imaged containing channels for Hoechst (DNA), which was used as the focus channel for every single image, FITC (Fluorescein isothiocyanate;  $\alpha$ -actinin) and TRITC (actin). The FITC channel was used to detect the Alexa Fluor® 488 label.

CellProfiler cell image analysis software (Broad Institute, Cambridge, MA, USA) was used to analyze the images. Object selection was based in adaptive intensity and fixed size thresholds for every single object. Object segmentation was optimized to achieve best possible resolution of single objects in dense clusters of cells. Parent objects were segmented in channel 1 (Hoechst) for data analysis. In addition, integrated intensity of objects in channel 1, mean area of child objects in channel 2 (FITC) and mean TRITC-intensity of child objects based on segmentation in channel 2 were measured. Based on the integrated intensity of the Hoechst signal of every single nucleus, nuclei were binned into viable or apoptotic cells. Only viable cells were used for further analysis. According to a threshold that was set manually for the mean TRITC signal, cells were either identified as cardiomyocytes or non-cardiomyocytes. For the cardiomyocyte fraction, each object was measured by its area as measured in channel 2 (FITC). Areas of cardiomyocytes measured in channel 2 (FITC) were displayed as histogram.

### **Engineered heart tissue (EHT)**

EHTs were generated as previously described (Hirt MN. et al., 2012). In brief, ventricular heart cells (the atria were carefully excised) from neonatal Wistar and Lewis rats (postnatal day 0 to 3) were isolated by a fractionated DNase/Trypsin digestion protocol. This procedure was reviewed and approved by the Ethics Commission of the Medical Association of Hamburg (Permit

Number: A6/516). Per EHT 500,000 rat ventricular heart cells, fibrinogen, thrombin and DMEM (2x, to match the volumes of fibrinogen and thrombin and thus ensuring isotonic conditions) were mixed and pipetted into molds, which were obtained by casting 2% agarose (in PBS) around polytetrafluoroethylene spacers in a 24-well culture dish. After polymerization of fibrin (1.5 hours), EHTs were transferable to new cell culture dishes filled with medium. EHTs were maintained in 37 °C, 7% CO<sub>2</sub>, and 40% O<sub>2</sub> humidified cell culture incubators throughout experiments. EHT-medium for the first 13 days of culture consisted of DMEM (Biochrom, F0415), 10% horse serum inactivated (Gibco, 26050), 1% Pen/Strep (Gibco, 15140), insulin (10 µg/ml, Sigma-Aldrich, #857653), and aprotinin (33 µg/ml, Sigma-Aldrich, #A1153). From day 13 onwards, three groups each comprising 6 EHTs were formed (matched according to contractile force). One group was further kept in EHT-medium containing 10% horse serum, the second group in serum-free medium, i.e. the above medium without horse serum plus triiodothyronine (T<sub>3</sub>, 0.5 ng/ml, European Commission – Joint Research Centre IRMM-469) and hydrocortisone (50 ng/ml, Sigma-Aldrich, #H0888), and the third group in EHT-medium prior to that conditioned on C26 cells for 2 days. The contractile activity of all EHTs was recorded repetitively throughout the culture time by a camera positioned above the incubator equipped with a glass roof. Cell culture dishes remained closed, which allowed repeated measurement under sterile conditions. Contractile force, frequency, and times and velocities of contraction and relaxation were analyzed by customized software (CTMV, Pforzheim, Germany) from these videos.

### **Triglyceride extraction from tissue**

Frozen heart tissues (minimum 70 mg) were lysed in 1.5 ml of chloroform:methanol (2:1) mixture. After centrifugation (30 min, 13,000 rpm, 20°C) 200 µl of 150 mM NaCl were added to 1 ml of the supernatants and were centrifuged again (2000 rpm, 5 min). 200 µl of the lower organic phase were transferred to tubes containing 40 µl chloroform:Triton™ X-100 (1:1) solution. Samples were dried using Speedvac (Christ, Osterode am Harz, Germany) overnight. To

the remaining Triton-lipid solutions were 200  $\mu$ l of dH<sub>2</sub>O added. Samples were mixed by placing on a rotating wheel for 1h at room temperature and stored at -80°C until required for triglyceride (TG) determination. TG level were determined using the Serum TG Determination Kit (Sigma Aldrich, #TR0100) and 20  $\mu$ l of extracted heart supernatant. TG content (TG-bound glycerol) was determined by subtracting the free glycerol (blank value) from the total glycerol (assay value).

### **Triglyceride isolation from cells**

Neonatal rat cardiomyocytes were seeded at  $1.25 \times 10^5$  cells per well on 6-well plates. Three days after seeding cells were treated with conditioned SN for 24 h.

Cells were harvested in 200  $\mu$ l of Triton™ X-100 (TX) lysis buffer (150 mM NaCl, 0.05% Triton™ X-100, 10 mM Tris/HCl (pH 8.0), 1x Protease Inhibitor Cocktail), frozen at -80°C for at least 24 h and sonicated after thawing for two cycles (one cycle: 30 sec on and 30 sec off). Cell debris was removed by centrifugation. Protein concentration was determined using the Pierce® BCA Protein Assay Kit (Thermo Scientific, Schwerte, Germany). TG level were determined using the Serum TG Determination Kit (Sigma Aldrich, #TR0100) and 70  $\mu$ l of extracted cell supernatant. TG content (TG-bound glycerol) was determined by subtracting the free glycerol (blank value) from the total glycerol (assay value).

### **Palmitate Uptake (Tracer)**

Neonatal rat cardiomyocytes were treated and seeded as described for TG isolation from cells. After 30 min starvation in Krebs-Henseleit buffer (KHB) cells were treated with 1 mM BSA palmitate conjugate solution spiked with 0.5  $\mu$ Ci/ml <sup>3</sup>H palmitate in KHB supplemented with 500  $\mu$ M carnitine and 450 mg/l glucose (based on Seahorse protocol) for 1 h. The aqueous phase of the supernatants was isolated by addition of 2:1 chloroform:methanol. For protein and TG measurements, cells were lysed as described for TG isolation from cells. Disintegrations per minute (dpm) were counted in a scintillation counter.

### **Transfection of HEK293 A cells with cDNA expression plasmids**

1 x 10<sup>5</sup> HEK293 A cells per well were seeded on 6-well plates 24 h prior to transfection and were transfected at 60% confluency using the calcium phosphate method and 2 µg of plasmid DNA. Cells were transfected either with ready-to-use cDNA expression plasmids obtained from Source BioScience (Nottingham, UK) or with pDest-eGFP-N1 plasmid (Addgene, Cambridge, MA, USA). Medium was changed 24 h after transfection and conditioned SN was produced as described before.

### **Transfection of C26 cells with small interfering RNA (siRNA)**

C26 cells were seeded at 1 x 10<sup>5</sup> cells/well on 6-well plates 24 h prior to transfection and were transfected at 60% confluency using HiPerFect Transfection Reagent (Qiagen, Hilden, Germany) and 5 nM of siRNA (Qiagen, Hilden, Germany). Cells were either transfected with a single siRNA or with seven siRNAs at once. An Alexa488 labelled siRNA and AllStars Negative Control (NC) from Qiagen (Hilden, Germany) served as controls. Medium was changed 24 h after transfection and conditioned SN was produced as described before.

### **Immunofluorescence**

Cardiomyocytes were seeded at 1.0 x 10<sup>5</sup> - 1.5 x 10<sup>5</sup> cells per well on cover slips in 24-well plates which were coated with 0.1% gelatin. Three days after seeding the cardiomyocytes were treated with conditioned SN for 24 h (neonatal rat cardiomyocytes) or 48 h (adult mouse cardiomyocytes). Cells were stained with the following antibodies: primary antibody: anti-sarcomeric  $\alpha$ -actinin (1:200 in 5% goat serum, 4°C, overnight; Sigma Aldrich, #A7811) and secondary antibody: Texas Red® anti-mouse (1:200 in 5% goat serum, 1 h; Vector Labs, Burlingame, CA) together with Hoechst 33258 (1:2000, 30 min; Dianova, Hamburg, Germany). Cover slips with the stained cells were fixated on object slides using FluorSave™ Reagent. Cardiomyocyte area was determined using colored pictures from  $\alpha$ -actinin immunostained

cardiomyocytes which were captured as described for the H&E cross sections. Analysis was performed in a blinded manner. Roughly 100 cells per condition were counted, and the averaged values were used for analysis.

**Figure S1**

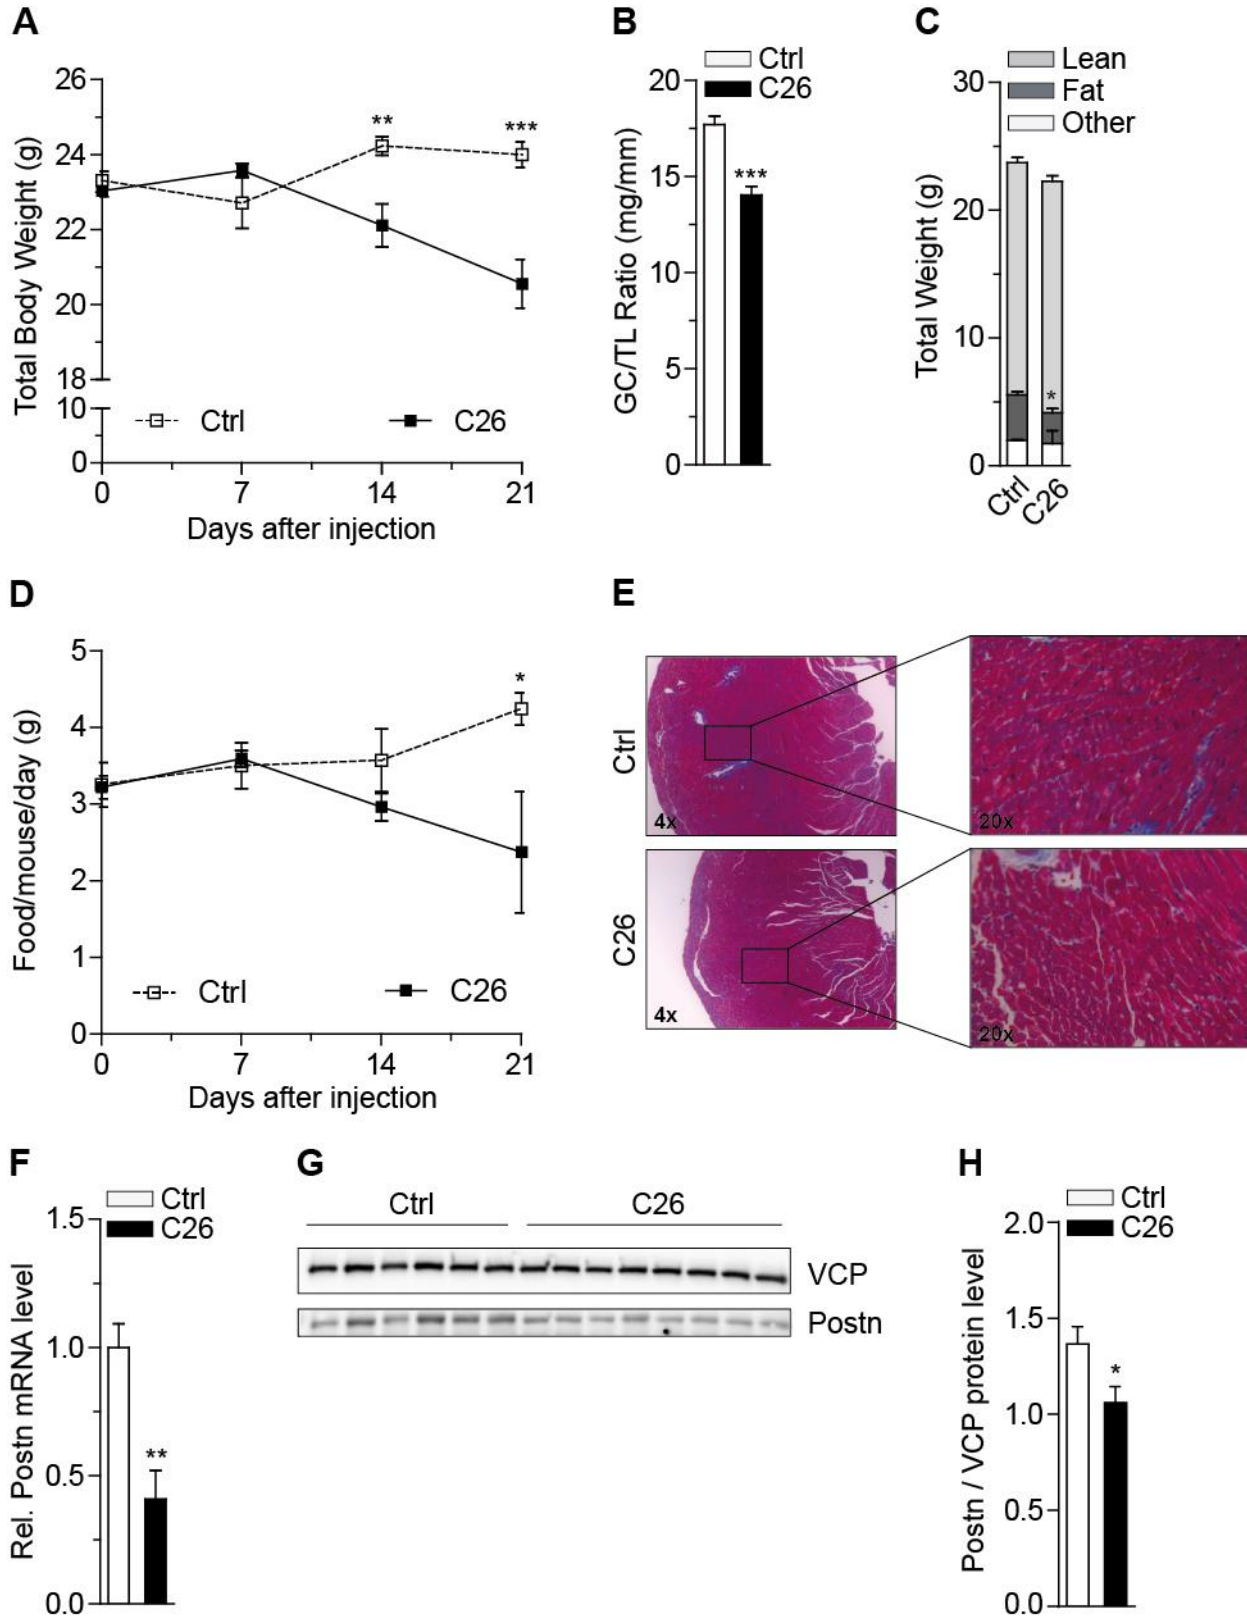



**Supplemental Figure S1:** (A) Body weight progression of control (Ctrl) and C26 bearing mice (n = 6 animals in Ctrl group, n = 10 animals in C26 group). (B) Gastrocnemius (GC) muscle weight/ tibia length (TL) ratio of the same mice at day 21 post PBS (Ctrl) or C26 cell injection. (C) Total body fat and total lean mass of the same mice at day 21 post PBS (Ctrl) or C26 cell injection. (D) Progression of food consumption for the same mice. (E) Representative images of trichrome stained heart cross-sections of a control (Ctrl) and a C26 bearing mouse (C26) at day 21 post PBS (Ctrl) or C26 cell injection (Magnification: 4x and 20x). (F) Relative mRNA level of fibrosis marker periostin (Postn) in the hearts of the same mice at day 21 post PBS (Ctrl) or C26 cell injection. (G) Immunoblot against periostin (Postn) and valosin-containing protein (VCP; loading control) from heart lysates of the same mice at day 21 post PBS (Ctrl) or C26 cell injection. (H) Relative Postn protein levels determined by densitometric analysis of the displayed immunoblot. (A) and (D) Data are means  $\pm$  SEM. \*indicates significance using 2-way ANOVA, Bonferroni post-test, \*p < 0.05, \*\*p < 0.01, \*\*\*p < 0.001. (B), (C), (F) and (H) Data are means  $\pm$  SEM. \*indicates significance using Student's t-test with Welch correction, \*p < 0.05, \*\*p < 0.01, \*\*\*p < 0.001

**Figure S2**

Systolic Parameters

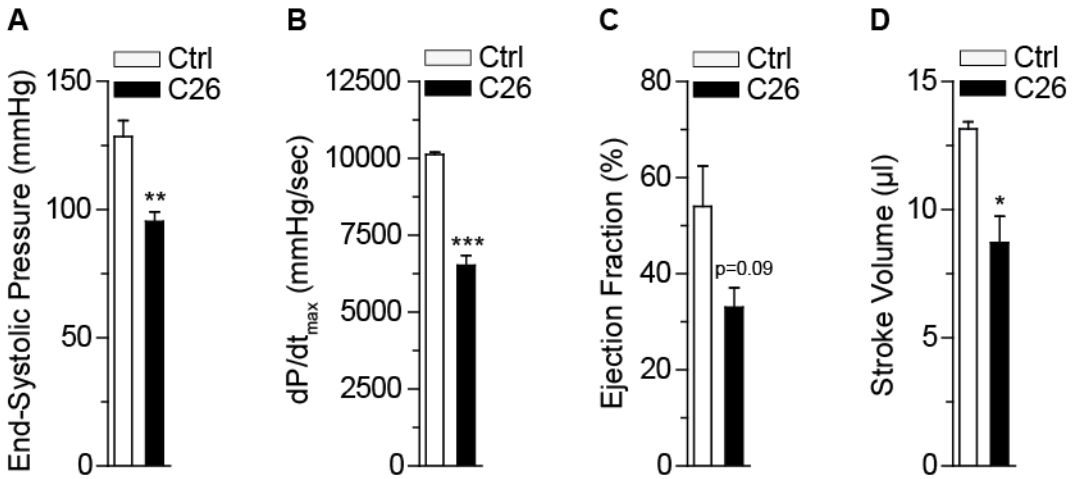

Diastolic Parameters

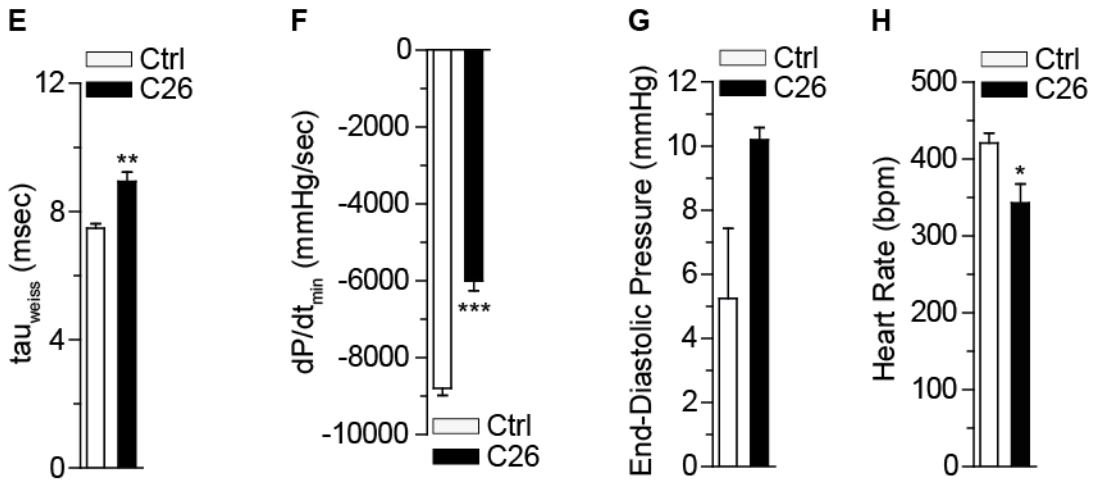

PV Loop

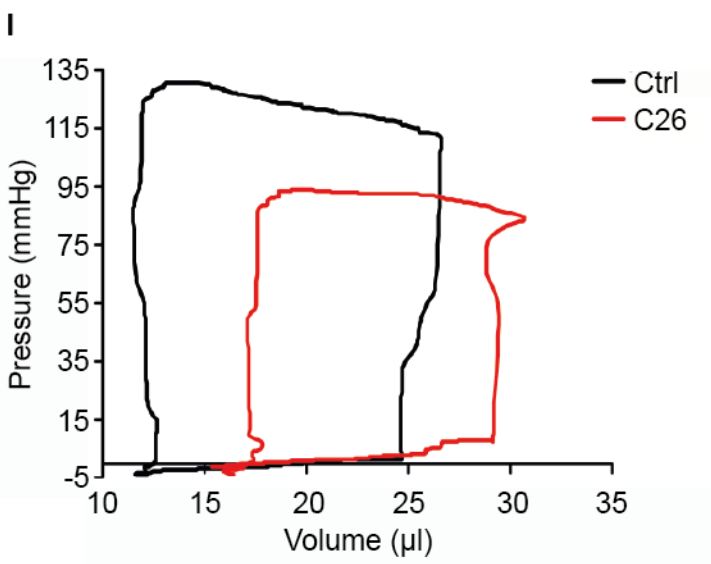

**Supplemental Figure S2:** Cardiac haemodynamics in control (Ctrl) and C26 bearing mice (C26) assessed by pressure-volume (PV) loops at day 14 (n = 4 animals for Ctrl group, n = 5 animals for C26 group). **(A) - (D):** Bar graphs showing different parameters for systolic function: **(A)** End-systolic pressure (ESP), **(B)**  $dP/dt_{max}$ , **(C)** Ejection fraction (EF) and **(D)** Stroke volume (SV). **(E) - (G)** Bar graphs showing different parameters for diastolic function: **(E)**  $\tau_{weiss}$ , **(F)**  $dP/dt_{min}$  and **(G)** End-diastolic pressure (EDP). **(H)** Heart rate (HR). **(I)** Representative pressure-volume (PV) loops for a control (Ctrl) and a C26 bearing mouse which were used for the quantifications shown in **(A) - (H)**. **(A) - (H)** Data are means  $\pm$  SEM. \*indicates significance using Student's t-test with Welch correction, \* $p < 0.05$ , \*\* $p < 0.01$ , \*\*\* $p < 0.001$ .

**Figure S3**

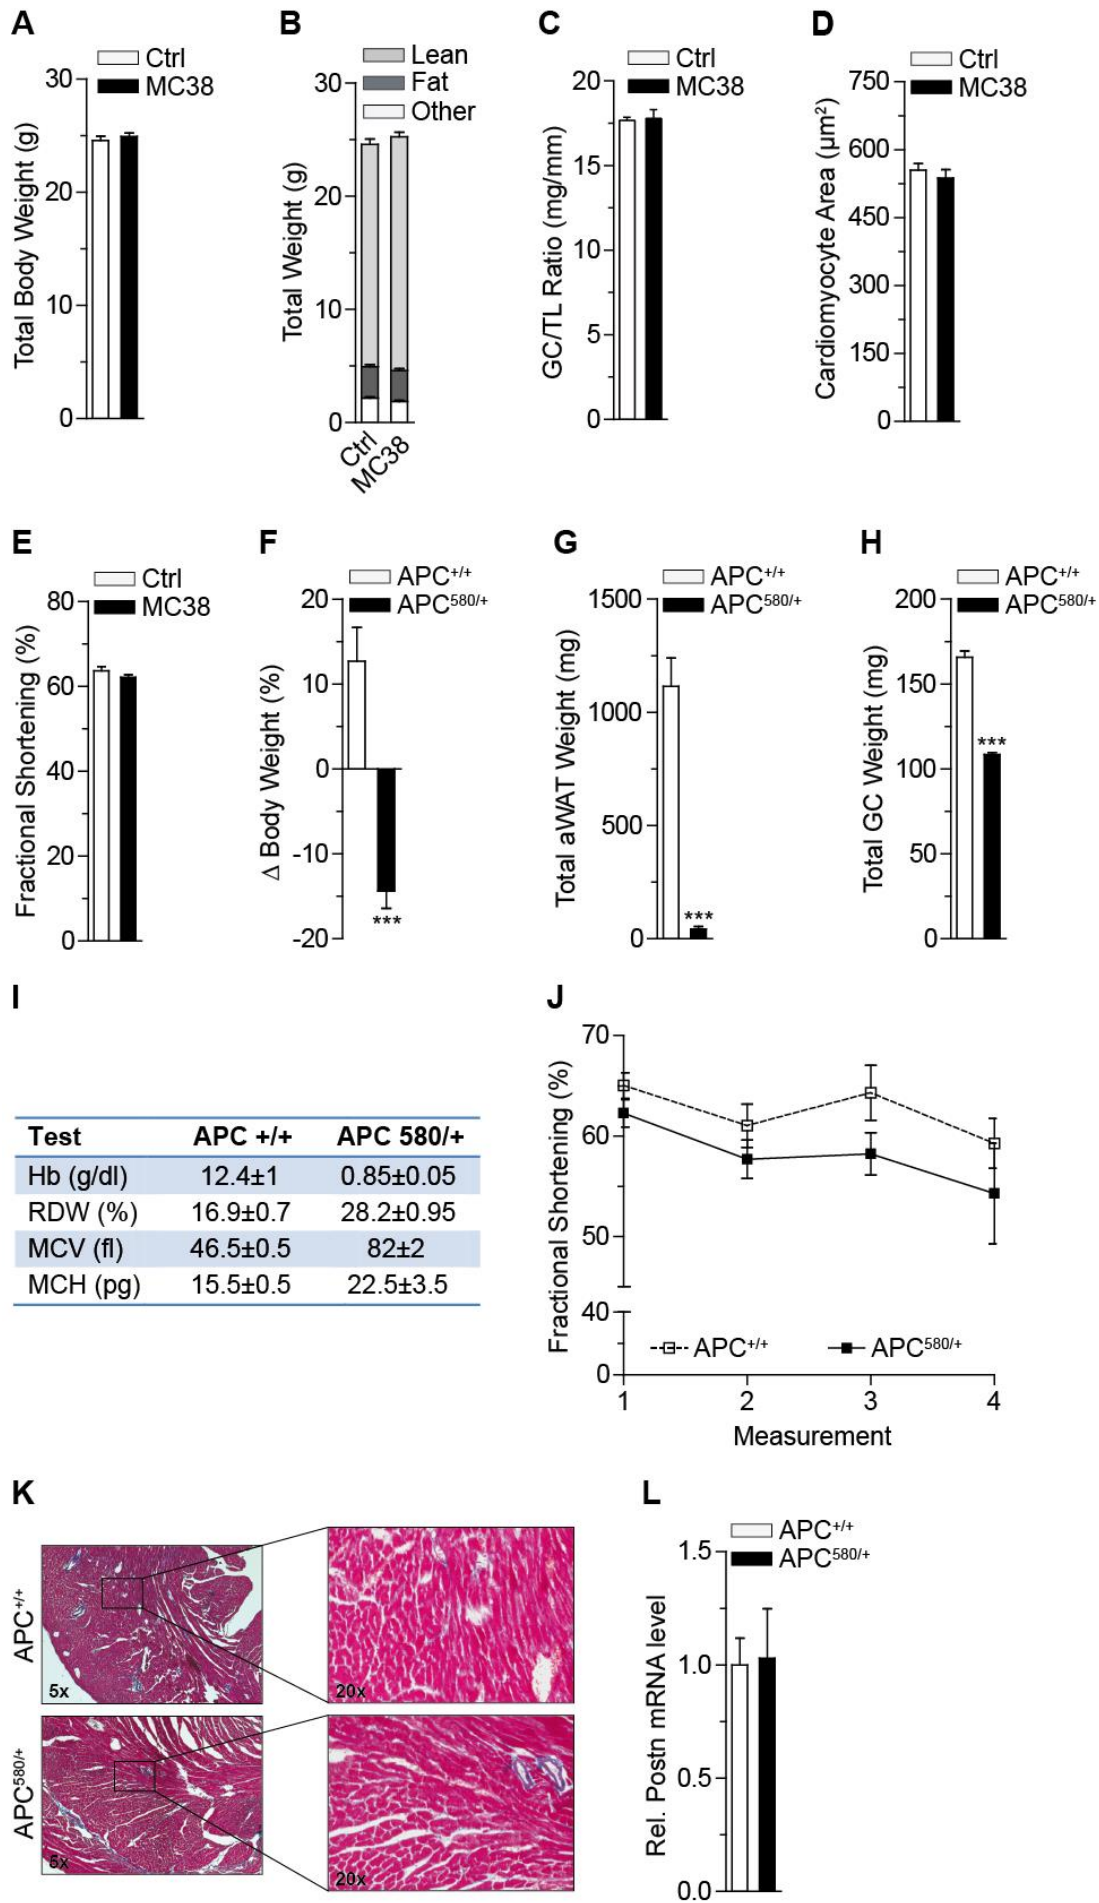

**Supplemental Figure S3:** (A) Total body weight of control (Ctrl) and MC38 bearing mice (MC38) (n = 8 animals for Ctrl group, n = 10 for MC38 group). Tumor weight was excluded. (B) Total lean and body fat mass of the same mice. (C) Gastrocnemius (GC) muscle weight/ tibia length (TL) ratio of the same mice. (D) Quantification of cardiomyocyte cross-sectional areas for the same mice (n  $\geq$  100 cardiomyocytes per heart; n = 4 hearts for Ctrl group, n = 5 hearts for MC38 group). (E) Fractional shortening (FS) for the same mice determined by using Sonos 5500. (F) Delta body weight change of wild-type (APC<sup>+/+</sup>) and APC delta 580 (APC<sup>580/+</sup>) mice at day of sacrifice (n = 6 animals for APC<sup>+/+</sup> group, n = 9 animals for APC<sup>580/+</sup> group). (G) Total abdominal white adipose tissue (aWAT) weight of the same mice. (H) Total gastrocnemius (GC) muscle weight of the same mice. (I) Blood count of anemic markers (hemoglobin (Hb), red cell distribution width (RDW), mean corpuscular/cell volume (MCV) and mean corpuscular/cell hemoglobin (MCH)) in the same mice (Data are means  $\pm$  SEM; n = 2 per group). (J) Progression of fractional shortening (FS) of the same mice determined by using Sonos 5500. (K) Representative images of trichrome stained heart cross-sections of a wild-type (APC<sup>+/+</sup>) and APC delta 580 (APC<sup>580/+</sup>) mouse (Magnification: 5x and 20x). (L) Relative mRNA level of fibrosis marker periostin (Postn) in the hearts of the same mice. (A) - (H), (J) and (L) Data are means  $\pm$  SEM. \*indicates significance using Student's t-test with Welch correction, \*\*\*p < 0.001.

**Figure S4**

**A**

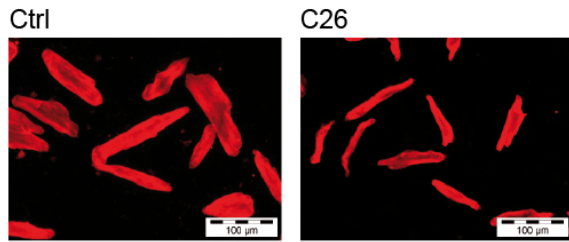

**B**

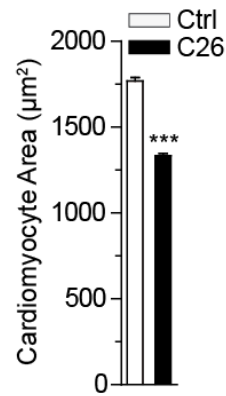

**C**

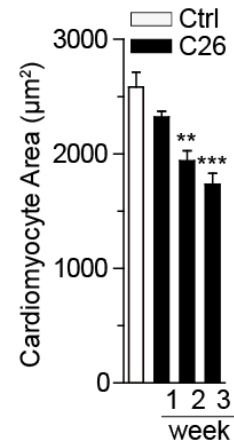

**D**

| Annotation Cluster 1 |                                       | Enrichment Score: 8.22 |                            |            |            |               |                            |
|----------------------|---------------------------------------|------------------------|----------------------------|------------|------------|---------------|----------------------------|
| GO ID                | Term                                  | Count                  | PValue                     | List total | Pop Hits   | Pop Total     | FDR                        |
| GO:0043436           | Oxoacid metabolic process             | 47                     | 9.1x10 <sup>-10</sup>      | 508        | 479        | 14,219        | 1.6x10 <sup>-6</sup>       |
| GO:0019752           | Carboxylic acid metabolic process     | 47                     | 9.1x10 <sup>-10</sup>      | 508        | 479        | 14,219        | 1.6x10 <sup>-6</sup>       |
| GO:0006082           | Organic acid metabolic process        | 47                     | 9.6x10 <sup>-10</sup>      | 508        | 480        | 14,219        | 1.7x10 <sup>-6</sup>       |
| GO:0032787           | Monocarboxylic acid metabolic process | 33                     | 2.0x10 <sup>-9</sup>       | 508        | 268        | 14,219        | 3.6x10 <sup>-6</sup>       |
| GO:0042180           | Cellular ketone metabolic process     | 47                     | 2.0x10 <sup>-9</sup>       | 508        | 491        | 14,219        | 3.6x10 <sup>-6</sup>       |
| GO:0006631           | <b>Fatty acid metabolic process</b>   | <b>25</b>              | <b>4.0x10<sup>-8</sup></b> | <b>508</b> | <b>184</b> | <b>14,219</b> | <b>6.9x10<sup>-5</sup></b> |
| GO:0006629           | <b>Lipid metabolic process</b>        | <b>55</b>              | <b>5.7x10<sup>-8</sup></b> | <b>508</b> | <b>696</b> | <b>14,219</b> | <b>1.0x10<sup>-4</sup></b> |
| GO:0044255           | Cellular lipid metabolic process      | 42                     | 2.3x10 <sup>-7</sup>       | 508        | 482        | 14,219        | 4.0x10 <sup>-4</sup>       |

  

| Annotation Cluster 6 |                                        | Enrichment Score: 1.89 |             |            |           |               |              |
|----------------------|----------------------------------------|------------------------|-------------|------------|-----------|---------------|--------------|
| GO ID                | Term                                   | Count                  | PValue      | List Total | Pop Hits  | Pop Total     | FDR          |
| GO:0015718           | Monocarboxylic acid transport          | 6                      | 0.0004      | 508        | 19        | 14,219        | 0.76         |
| GO:0046942           | Carboxylic acid transport              | 11                     | 0.003       | 508        | 99        | 14,219        | 4.74         |
| GO:0015849           | Organic acid transport                 | 11                     | 0.003       | 508        | 100       | 14,219        | 5.01         |
| GO:0015908           | <b>Fatty acid transport</b>            | <b>4</b>               | <b>0.01</b> | <b>508</b> | <b>13</b> | <b>14,219</b> | <b>16.00</b> |
| GO:0015909           | <b>Long-chain fatty acid transport</b> | <b>3</b>               | <b>0.02</b> | <b>508</b> | <b>7</b>  | <b>14,219</b> | <b>34.27</b> |
| GO:0015804           | Neutral amino acid transport           | 3                      | 0.08        | 508        | 13        | 14,219        | 75.15        |
| GO:0006865           | Amino acid transport                   | 6                      | 0.11        | 508        | 71        | 14,219        | 86.75        |
| GO:0015837           | Amine transport                        | 7                      | 0.11        | 508        | 92        | 14,219        | 87.12        |

  

| Annotation Cluster 7 |                            | Enrichment Score: 1.85 |              |            |            |               |             |
|----------------------|----------------------------|------------------------|--------------|------------|------------|---------------|-------------|
| GO ID                | Term                       | Count                  | PValue       | List Total | Pop Hits   | Pop Total     | FDR         |
| GO:0010876           | <b>Lipid localization</b>  | <b>13</b>              | <b>0.002</b> | <b>508</b> | <b>128</b> | <b>14,219</b> | <b>3.56</b> |
| GO:0006869           | <b>Lipid transport</b>     | <b>12</b>              | <b>0.003</b> | <b>508</b> | <b>119</b> | <b>14,219</b> | <b>5.94</b> |
| GO:0033036           | Macromolecule localization | 35                     | 0.40         | 508        | 902        | 14,219        | 99.99       |

  

| Annotation Cluster 10 |                                                    | Enrichment Score: 1.77 |               |            |            |               |              |
|-----------------------|----------------------------------------------------|------------------------|---------------|------------|------------|---------------|--------------|
| GO ID                 | Term                                               | Count                  | PValue        | List Total | Pop Hits   | Pop Total     | FDR          |
| GO:0033559            | <b>Unsaturated fatty acid metabolic process</b>    | <b>8</b>               | <b>0.0002</b> | <b>508</b> | <b>36</b>  | <b>14,219</b> | <b>0.42</b>  |
| GO:0006690            | Icosanoid metabolic process                        | 7                      | 0.001         | 508        | 34         | 14,219        | 1.99         |
| GO:0008610            | <b>Lipid biosynthetic process</b>                  | <b>20</b>              | <b>0.007</b>  | <b>508</b> | <b>285</b> | <b>14,219</b> | <b>11.29</b> |
| GO:0006633            | <b>Fatty acid biosynthetic process</b>             | <b>9</b>               | <b>0.008</b>  | <b>508</b> | <b>81</b>  | <b>14,219</b> | <b>13.35</b> |
| GO:0006692            | Prostanoid metabolic process                       | 4                      | 0.01          | 508        | 14         | 14,219        | 19.40        |
| GO:0006693            | Prostaglandin metabolic process                    | 4                      | 0.01          | 508        | 14         | 14,219        | 19.40        |
| GO:0046456            | Icosanoid biosynthetic process                     | 5                      | 0.01          | 508        | 27         | 14,219        | 22.75        |
| GO:0006636            | <b>Unsaturated fatty acid biosynthetic process</b> | <b>5</b>               | <b>0.02</b>   | <b>508</b> | <b>28</b>  | <b>14,219</b> | <b>25.41</b> |
| GO:0046394            | Carboxylic acid biosynthetic process               | 11                     | 0.03          | 508        | 141        | 14,219        | 40.85        |
| GO:0016053            | Organic acid biosynthetic process                  | 11                     | 0.03          | 508        | 141        | 14,219        | 40.85        |
| GO:0043450            | Alkene biosynthetic process                        | 3                      | 0.12          | 508        | 17         | 14,219        | 89.66        |
| GO:0019370            | Leukotriene biosynthetic process                   | 3                      | 0.12          | 508        | 17         | 14,219        | 89.66        |
| GO:0006691            | Leukotriene metabolic process                      | 3                      | 0.15          | 508        | 19         | 14,219        | 93.69        |
| GO:0043449            | Cellular alkene metabolic process                  | 3                      | 0.17          | 508        | 21         | 14,219        | 96.28        |

**E**

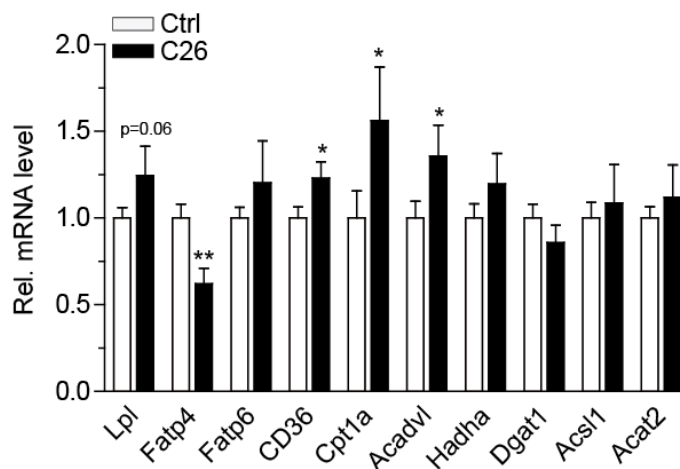

**Supplemental Figure S4:** (A) Immunofluorescence staining of  $\alpha$ -actinin in adult mouse cardiomyocytes cultured in standard medium (Ctrl) or conditioned medium from C26 cells for 48h (Magnification: 20x). (B) Quantification of cardiomyocyte area of the experiment shown in (A) ( $n \geq 100$  cardiomyocytes per condition). (C) Size of neonatal rat cardiomyocytes that were cultured in 2% serum from control (Ctrl) or C26 bearing mice (C26) that was collected at day 7, 14 and 21 post PBS (Ctrl) or C26 cell injection. (D) Gene ontology enrichment analysis of biological processes (GO-BP) of heart lysates from C26 bearing mice sacrificed at day 14 post PBS (Ctrl) or C26 cell injection ( $n = 3$  animals per group). (E) Relative mRNA level of lipoprotein lipase (Lpl), fatty acid transporter 4 (Fatp4), fatty acid transporter 6 (Fatp6), fatty acid translocase (FAT/CD36), carnitine palmitoyltransferase 1a (Cpt1a), acyl-CoA dehydrogenase, very long chain (Acadvl), hydroxyacyl-CoA dehydrogenase/3-ketoacyl-CoA thiolase/enoyl-CoA hydratase (Hadha), diglyceride acyltransferase 1 (Dgat1), acyl-CoA synthetase long-chain family member 1 (Acs11) and acetyl-CoA acetyltransferase 2 (Acat2) in hearts from control (Ctrl) and C26 bearing mice (C26) at day 21 post PBS (Ctrl) or C26 cell injection ( $n = 6$  animals for Ctrl group,  $n = 10$  animals for C26 group). (B) and (E) Data are means  $\pm$  SEM. \*indicates significance using Student's t-test with Welch correction, \* $p < 0.05$ , \*\* $p < 0.01$ , \*\*\* $p < 0.001$ . (C) Data are means  $\pm$  SEM. \*indicates significance using 2-way ANOVA, Bonferroni post-test, \*\* $p < 0.01$ , \*\*\* $p < 0.001$ .

**Figure S5**

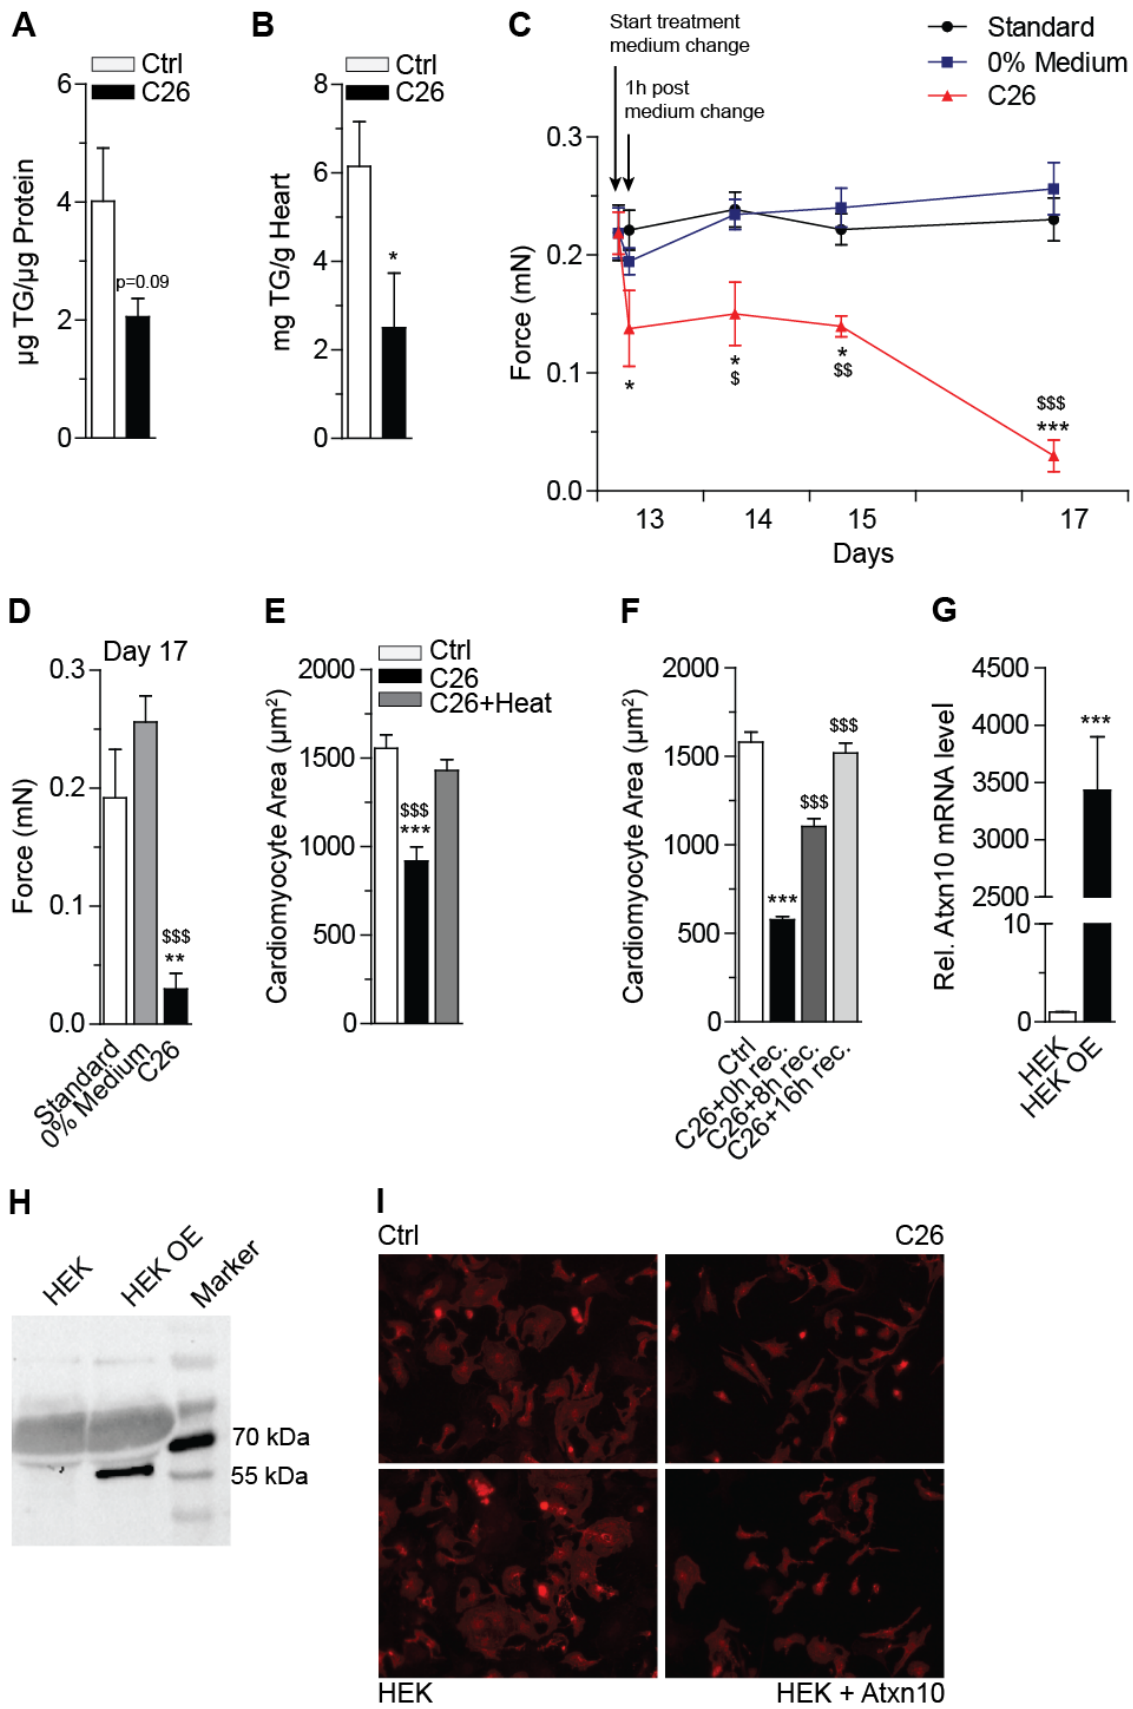



**Supplemental Figure S5:** (A) Triglyceride (TG) content of neonatal rat cardiomyocytes cultured in standard medium (Ctrl) or C26 conditioned medium (C26) for 24 h (n = 4 cell culture wells for Ctrl group, n = 4 cell culture wells for C26 group). TG content was normalized to protein content. (B) Triglyceride (TG) level in hearts of control (Ctrl) and C26 bearing mice (C26) (n = 5 animals for Ctrl group, n = 6 animals for C26 group). TG content was normalized to frozen dry heart weight. (C) and (D) Functional impact of conditioned medium from C26 cells on rat engineered heart tissue EHT. (C) After 13 days of standard culture 3 groups of each 6 EHTs with the same mean contractile force were formed. EHTs were incubated in standard EHT-medium (Standard), serum-free EHT-medium (0% Medium) and standard EHT after conditioning on C26 cells. Contractile force was recorded after 1 hour, 1 day (day 14 of culture), 2 days (day 15 of culture) and 4 days (day 17 of culture) (n ≥ 3). (D) Bar graph showing forces on day 17 of culture of the same EHT experiment (n = 5 cell culture wells for Standard group, n = 6 cell culture wells for 0% Medium group, n = 3 cell culture wells for C26 group). (E) Quantification of the size of neonatal rat cardiomyocytes cultured in standard medium (Ctrl), C26 conditioned medium (C26) and C26 conditioned medium that was heated at 95°C for 5 min (C26+heat) for 24 h (n ≥ 100 per condition). (F) Quantification of the size of neonatal rat cardiomyocytes cultured in standard medium (Ctrl) and C26 conditioned medium (C26+0h recovery (rec.)) for 40 h and in C26 conditioned medium for 24 h followed by an exchange to standard medium for additional 8 h (C26+8h rec.) and 16h (C26+16h rec.), respectively (n ≥ 100 per condition). (G) Relative mRNA level of Ataxin-10 (Atxn10) in untreated HEK293A cells (HEK) and HEK293A cells treated with Atxn10 overexpressing cDNA clone (HEK OE) (n = 3 per condition). (H) Immunoblot against Atxn10 (55 kDa) from conditioned medium of the same cells shown in (G). Fraction containing Atxn10 was enriched by centrifugal protein enrichment using Nanosep® columns (10K; Pall, Port Washington, NY, USA) (I) Immunofluorescence staining of α-actinin in neonatal rat cardiomyocytes cultured in standard medium (Ctrl), conditioned medium from C26 cells or HEK293A cells either untreated or treated with Ataxin-10 (Atxn10) overexpressing cDNA clone for 24h. (Magnification: 20x). (A), (B) and (G) Data are means ± SEM. \*indicates significance

using Student's t-test with Welch correction, \* $p < 0.05$ , \*\*\* $p < 0.001$ . **(C)** Data are means  $\pm$  SEM. \*indicates significance using 2-way ANOVA, Bonferroni post-test, compared to standard, \* $p < 0.05$ , \*\*\* $p < 0.001$ . \$indicates significance using 2-way ANOVA, Bonferroni post-test, compared to 0% medium, \$ $p < 0.05$ , \$\$ $p < 0.01$ , \$\$\$ $p < 0.001$ . **(D)**, **(E)** and **(F)** Data are means  $\pm$  SEM. \*indicates significance using 1-way ANOVA, Bonferroni post-test, compared to standard or Ctrl, \*\* $p < 0.01$ , \*\*\* $p < 0.001$ . \$indicates significance using 1-way ANOVA, Bonferroni post-test, compared to C26 or C26+0h rec., \$\$\$ $p < 0.001$ .

**Figure S6**

**A**

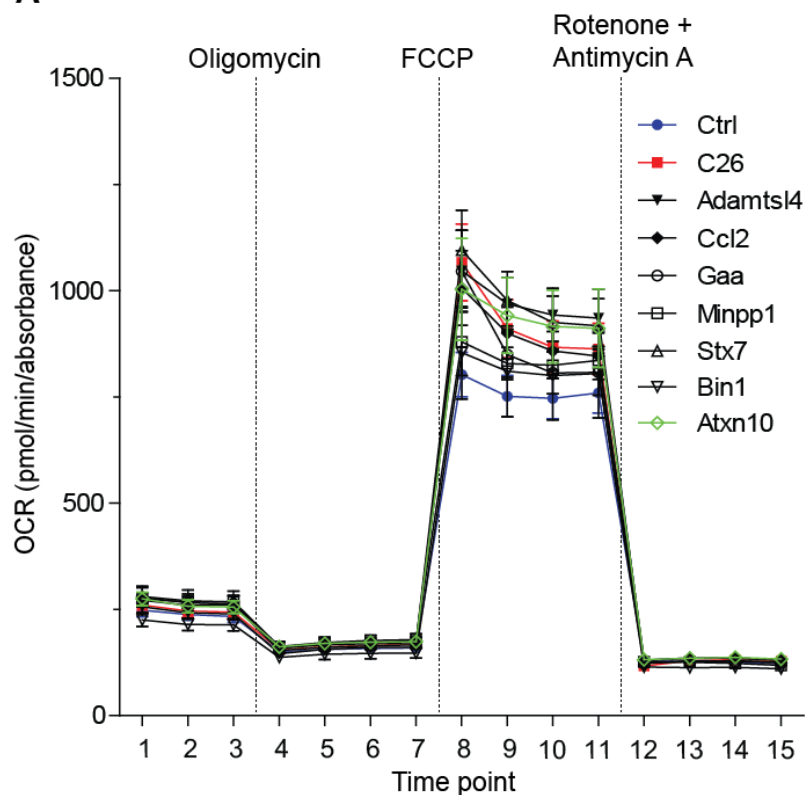

**B**

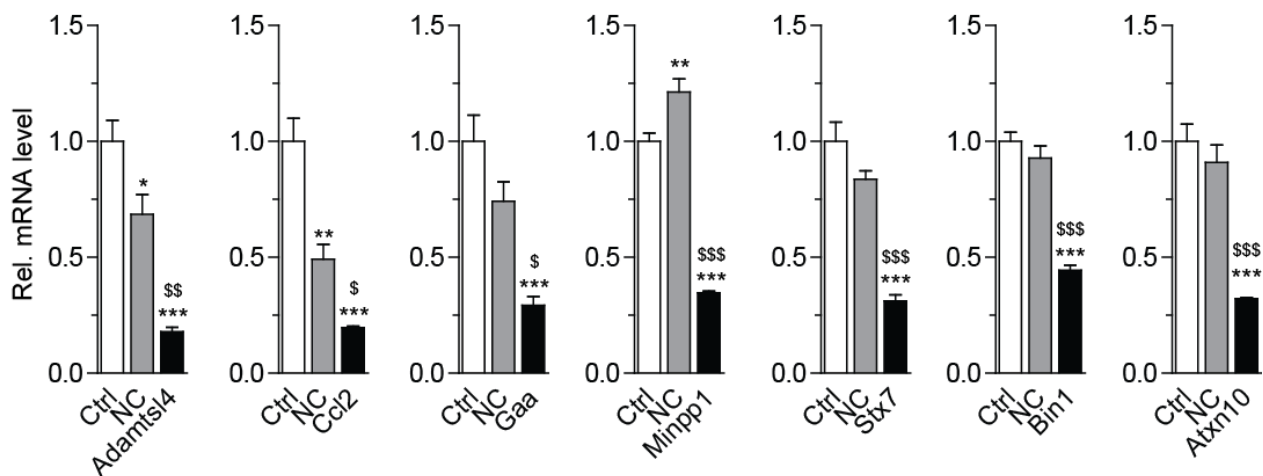

**C**

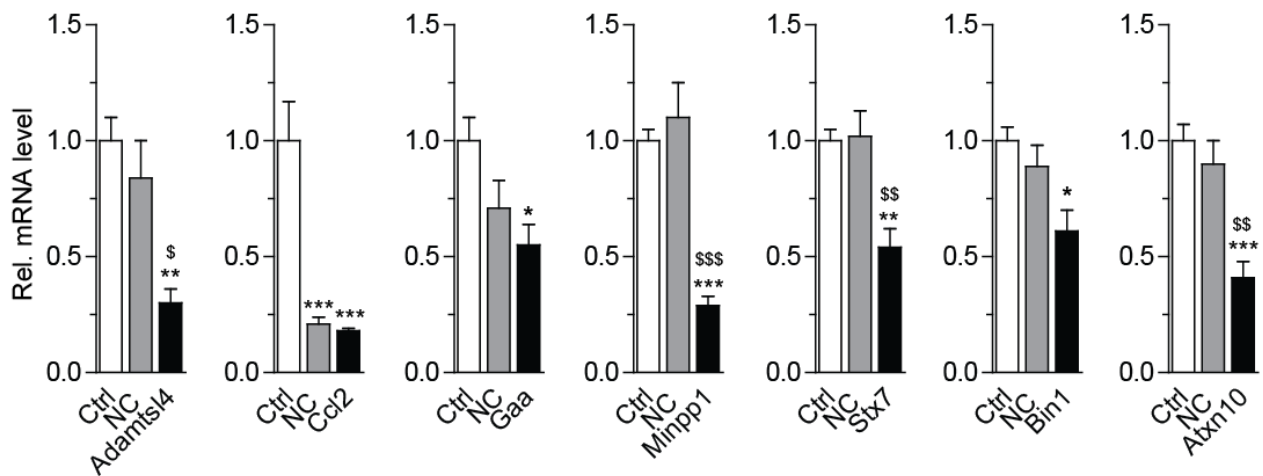

**Supplemental Figure S6:** (A) MitoStress test of neonatal rat cardiomyocytes cultured in standard medium (Ctrl) or conditioned medium from C26 cells or HEK293A cells that over-expressed one of the selective “cachexokines” (Adamts like 4 (Adamtsl4), Chemokine ligand 2 (Ccl2), Glucosidase alpha acid (Gaa), Multiple inositol-polyphosphate phosphatase 1 (Minpp1), Syntaxin 7 (Stx7), Bridging integrator 1 (Bin1) and Ataxin-10 (Atxn10)) for 24 h (n = 6 cell culture wells for Bin1 group, n = 7 cell culture wells for Ctrl, Adamtsl4 and Minpp1 group, n = 8 cell culture wells for C26, Atxn10, Ccl2, Gaa and Stx7 group). Mitochondrial function is expressed by oxygen consumption rate (OCR; means  $\pm$  SEM). (B) Relative mRNA level of selective “cachexokines” (see (A)) of untreated C26 cells and C26 cells that were either transfected with negative control siRNA (NC) or with siRNA directed against the indicated genes (n = 4 per condition). (C) Relative mRNA level of selective “cachexokines” (see (A)) of untreated C26 cells and C26 cells that were either transfected with negative control siRNA (NC) or with a siRNA mixture directed against all indicated “cachexokines” (n = 4 per condition). (B) and (C) Data are means  $\pm$  SEM. \*indicates significance using 1-way ANOVA, Bonferroni post-test, compared to Ctrl \*p < 0.05, \*\*p < 0.01, \*\*\*p < 0.001. \$indicates significance using 1-way ANOVA, Bonferroni post-test, compared to NC, \$p < 0.05, \$\$p < 0.01, \$\$\$p < 0.001.

**Figure S7**

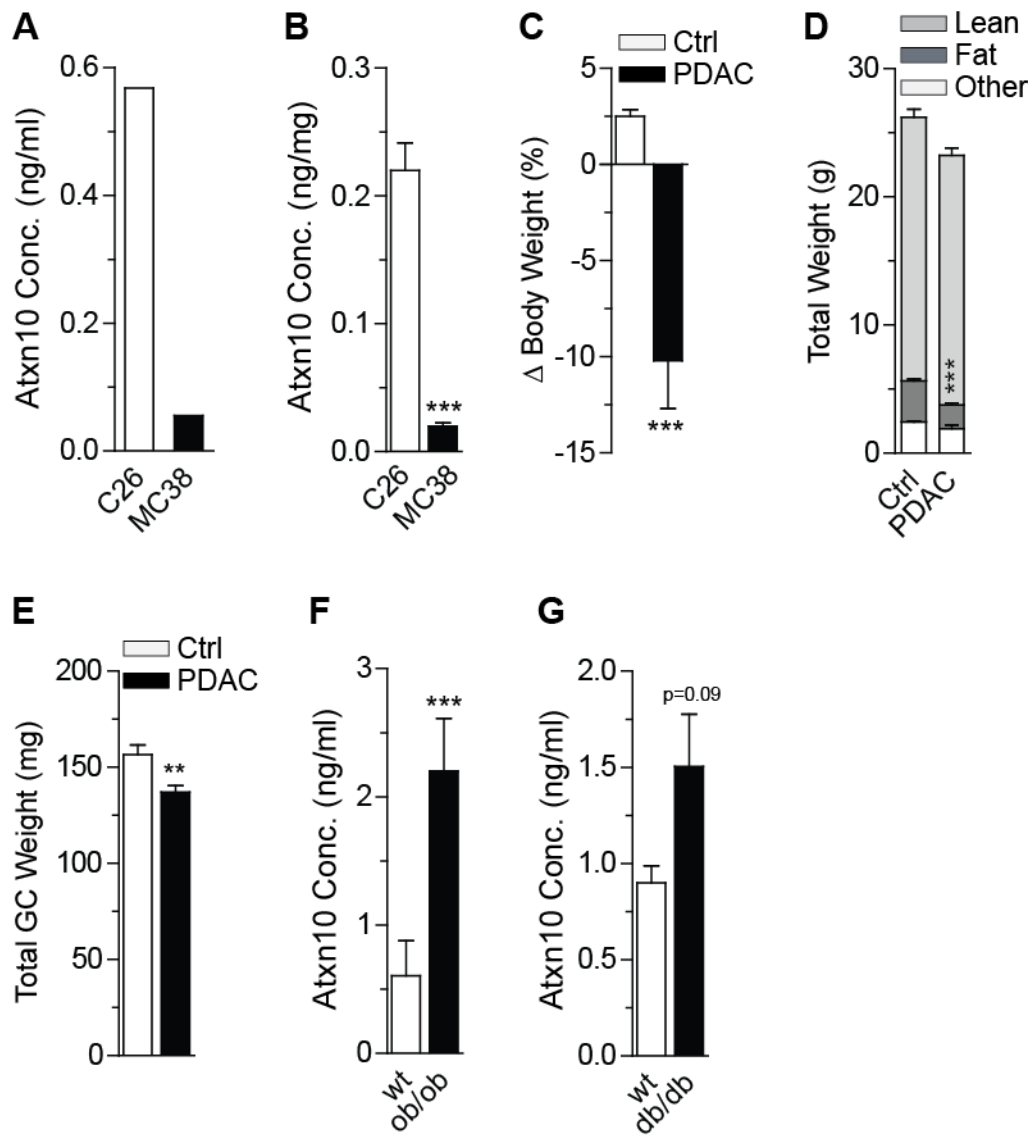

**Supplemental Figure S7:** Ataxin-10 (Atxn10) levels in **(A)** conditioned medium from C26 and MC38 cells (n = 2 per condition), **(B)** in resected tumors from C26 and MC38 mice (n = 3 tumors for MC38 group, n = 5 tumors for C26 group) and **(C)** Delta body weight change of wild-type mice (Ctrl) and mice that underwent orthotopic implantation of pancreatic cancer cells (PDAC) (n = 8 animals for Ctrl group, n = 13 animals for PDAC group). **(D)** Total body fat and lean mass of the same mice. **(E)** Total gastrocnemius (GC) weight of the same mice. **(F)** Ataxin-10 (Atxn10) level in wild-type (Ctrl) and obese (ob/ob) mice (n = 5 animals per group). **(G)** Ataxin-10 (Atxn10) level in wild-type (Ctrl) and diabetic (db/db) mice (n = 5 animals per group). **(A) - (G)** Data are means  $\pm$  SEM. \*indicates significance using Student's t-test with Welch correction, \*\*p < 0.01, \*\*\*p < 0.001.

## **Supplemental Table Legends**

### **Table 1:**

Raw data of secretome analysis of cachexia-inducing C26 cells compared to non-cachexia-inducing MC38 cells (related to Figure 3).

### **Table 2:**

Annotation of all used ready-to-use cDNA overexpression plasmids. All ORF clones are based on the human gene sequence and do not include any tag. cDNA clones were obtained from Source BioScience (Nottingham, UK, USA).

### **Table 3:**

Clinico-pathological data of pancreatic ductal adenocarcinoma (PDAC) patients. Ataxin-10 (Atn10) serum levels were determined in pre-surgery serum samples of these patients by using Sandwich-ELISA (Fig. 5G). BMI: Body mass index, BW: Body weight, neoTX: neoadjuvant therapy (radio- and/or chemotherapy), pT-, pN-, pM-stage: pathologic (p) tumor staging according to Tumor-Node-Metastasis (TNM) classification, R-status: tumor staging according to residual tumor (R) classification.
